# Supplementary material for: Polygenic Risk Score for Coronary Heart Disease Modifies the Elevated Risk by Cigarette Smoking for Disease Incidence
Source: PubMed Central journal article supplement — Circ Genom Precis Med. 2018 Jan 12;11(1):e001856. doi: 10.1161/CIRCGEN.117.001856 (PMC6319562; doi:10.1161/circgen.117.001856), 2018-01-12

# **SUPPLEMENTAL MATERIAL**

**Supplemental Table 1.** Coronary Heart Disease Associated Single Nucleotide Polymorphisms Included in the Polygenic Risk Score

| Lead SNP   | Proxy SNP (r <sup>2</sup> ) | Gene       | Risk Allele | Other Allele | Risk Allele Frequency | Risk Estimate (published) | Reference                      | Pleiotropy*             |
|------------|-----------------------------|------------|-------------|--------------|-----------------------|---------------------------|--------------------------------|-------------------------|
| rs599839   | rs646776 (0.91)             | SORT1      | T           | C            | 0.77                  | 1.11                      | CARDIoGRAM <sup>1</sup>        | Lipids, Type 2 Diabetes |
| rs17114036 |                             | PPAP2B     | A           | G            | 0.92                  | 1.11                      | CARDIoGRAMplusC4D <sup>2</sup> | Blood Pressure          |
| rs11206510 |                             | PCSK9      | T           | C            | 0.82                  | 1.08                      | CARDIoGRAM <sup>1</sup>        | Lipids                  |
| rs17465637 |                             | MIA3       | C           | A            | 0.74                  | 1.14                      | CARDIoGRAM <sup>1</sup>        |                         |
| rs6725887  |                             | WDR12      | G           | A            | 0.13                  | 1.12                      | CARDIoGRAMplusC4D <sup>2</sup> | Lipids                  |
| rs9818870  |                             | MRAS       | T           | C            | 0.16                  | 1.07                      | CARDIoGRAMplusC4D <sup>2</sup> |                         |
| rs17609940 |                             | ANKS1A     | G           | C            | 0.79                  | 1.07                      | CARDIoGRAM <sup>1</sup>        |                         |
| rs12526453 |                             | PHACTR1    | G           | C            | 0.67                  | 1.1                       | CARDIoGRAM <sup>1</sup>        |                         |
| rs12190287 |                             | TCF21      | C           | G            | 0.63                  | 1.07                      | CARDIoGRAMplusC4D <sup>2</sup> |                         |
| rs3798220  |                             | LPA        | C           | T            | 0.01                  | 1.51                      | CARDIoGRAM <sup>1</sup>        | Lipids                  |
| rs10455872 |                             | LPA        | C           | T            | 0.07                  | 1.45                      | IBC 50k CAD                    | Lipids                  |
| rs11556924 |                             | ZC3HC1     | C           | T            | 0.63                  | 1.09                      | CARDIoGRAMplusC4D <sup>2</sup> | Lipids, Blood Pressure  |
| rs4977574  |                             | CDKN2A     | G           | A            | 0.45                  | 1.29                      | CARDIoGRAM <sup>1</sup>        |                         |
| rs579459   |                             | ABO        | C           | T            | 0.23                  | 1.07                      | CARDIoGRAMplusC4D <sup>2</sup> | Lipids, Blood Pressure  |
| rs501120   | rs1746048 (1)               | CXCL12     | C           | T            | 0.86                  | 1.07                      | CARDIoGRAMplusC4D <sup>2</sup> |                         |
| rs12413409 |                             | CYP17A1    | G           | A            | 0.89                  | 1.12                      | CARDIoGRAM <sup>1</sup>        | Blood Pressure          |
| rs964184   |                             | APOA5      | G           | C            | 0.13                  | 1.13                      | CARDIoGRAM <sup>1</sup>        | Lipids                  |
| rs2259816  |                             | HNF1A      | T           | G            | 0.35                  | 1.08                      | Erdmann et al. (2009)          | Lipids                  |
| rs3184504  |                             | SH2B3      | T           | C            | 0.48                  | 1.07                      | CARDIoGRAMplusC4D <sup>2</sup> | Lipids, Blood Pressure  |
| rs4773144  |                             | COL4A1     | G           | A            | 0.41                  | 1.07                      | CARDIoGRAMplusC4D <sup>2</sup> |                         |
| rs2895811  |                             | HHIPL1     | C           | T            | 0.45                  | 1.06                      | CARDIoGRAMplusC4D <sup>2</sup> |                         |
| rs3825807  |                             | ADAMTS7    | A           | G            | 0.57                  | 1.08                      | CARDIoGRAM <sup>1</sup>        | Type 2 Diabetes         |
| rs12936587 |                             | RASD1      | G           | A            | 0.53                  | 1.06                      | CARDIoGRAMplusC4D <sup>2</sup> |                         |
| rs216172   |                             | SMG6       | C           | G            | 0.36                  | 1.07                      | CARDIoGRAM <sup>1</sup>        |                         |
| rs46522    | rs318090 (1)                | UBE2Z      | A           | G            | 0.52                  | 1.06                      | CARDIoGRAM <sup>1</sup>        |                         |
| rs1122608  |                             | LDLR       | G           | T            | 0.77                  | 1.1                       | CARDIoGRAMplusC4D <sup>2</sup> | Lipids, Type 2 Diabetes |
| rs9982601  |                             | KCNE2      | T           | C            | 0.14                  | 1.13                      | CARDIoGRAMplusC4D <sup>2</sup> |                         |
| rs4845625  |                             | IL6R       | T           | C            | 0.43                  | 1.04                      | CARDIoGRAMplusC4D <sup>2</sup> |                         |
| rs1561198  | rs2028900 (0.95)            | GGCX/VAMP8 | T           | C            | 0.43                  | 1.05                      | CARDIoGRAMplusC4D <sup>2</sup> |                         |
| rs6544713  | rs4299376 (1)               | ABCG8      | G           | T            | 0.29                  | 1.06                      | CARDIoGRAMplusC4D <sup>2</sup> | Lipids                  |

| Lead SNP   | Proxy SNP (r <sup>2</sup> ) | Gene              | Risk Allele | Other Allele | Risk Allele Frequency | Risk Estimate (published) | Reference                      | Pleiotropy*            |
|------------|-----------------------------|-------------------|-------------|--------------|-----------------------|---------------------------|--------------------------------|------------------------|
| rs515135   |                             | APOB              | C           | T            | 0.83                  | 1.08                      | CARDIoGRAMplusC4D <sup>2</sup> | Lipids                 |
| rs2252641  |                             | ZEB2-AC074093.1   | C           | T            | 0.44                  | 1.04                      | CARDIoGRAMplusC4D <sup>2</sup> |                        |
| rs1878406  |                             | EDNRA             | T           | C            | 0.13                  | 1.06                      | CARDIoGRAMplusC4D <sup>2</sup> |                        |
| rs7692387  |                             | GUCY1A3           | G           | A            | 0.8                   | 1.06                      | CARDIoGRAMplusC4D <sup>2</sup> | Blood Pressure         |
| rs273909   |                             | SLC22A4/SLC22A5   | G           | A            | 0.13                  | 1.09                      | CARDIoGRAMplusC4D <sup>2</sup> | Lipids                 |
| rs10947789 |                             | KCNK5             | T           | C            | 0.75                  | 1.06                      | CARDIoGRAMplusC4D <sup>2</sup> |                        |
| rs2048327  |                             | SLC22A3/LPAL2/LPA | C           | T            | 0.41                  | 1.06                      | CARDIoGRAMplusC4D <sup>2</sup> | Lipids                 |
| rs4252120  |                             | PLG               | T           | C            | 0.71                  | 1.06                      | CARDIoGRAMplusC4D <sup>2</sup> |                        |
| rs2023938  | rs11984041<br>(0.86)        | HDAC9             | T           | C            | 0.09                  | 1.07                      | CARDIoGRAMplusC4D <sup>2</sup> |                        |
| rs10953541 |                             | BCAP29            | C           | T            | 0.75                  | 1.08                      | CAD C4D <sup>5</sup>           | Lipids                 |
| rs2954029  |                             | TRIB1             | A           | T            | 0.52                  | 1.04                      | CARDIoGRAMplusC4D <sup>2</sup> | Lipids, Blood Pressure |
| rs3217992  |                             | CDKN2BAS          | T           | C            | 0.34                  | 1.16                      | CARDIoGRAMplusC4D <sup>2</sup> | Type 2 Diabetes        |
| rs2505083  | rs2487928<br>(0.88)         | KIAA1462          | A           | G            | 0.44                  | 1.06                      | CARDIoGRAMplusC4D <sup>2</sup> |                        |
| rs2047009  |                             | CXCL12            | G           | T            | 0.51                  | 1.05                      | CARDIoGRAMplusC4D <sup>2</sup> |                        |
| rs2246833  | rs1412444<br>(0.98)         | LIPA              | T           | C            | 0.35                  | 1.06                      | CARDIoGRAMplusC4D <sup>2</sup> |                        |
| rs974819   | rs11226029 (1)              | PDGFD             | G           | A            | 0.26                  | 1.07                      | CARDIoGRAMplusC4D <sup>2</sup> |                        |
| rs9319428  |                             | FLT1              | A           | G            | 0.32                  | 1.05                      | CARDIoGRAMplusC4D <sup>2</sup> |                        |
| rs9515203  |                             | COL4A1/COL4A2     | T           | C            | 0.71                  | 1.08                      | CARDIoGRAMplusC4D <sup>2</sup> |                        |
| rs7173743  |                             | ADAMTS7           | T           | C            | 0.58                  | 1.07                      | CARDIoGRAMplusC4D <sup>2</sup> |                        |
| rs17514846 |                             | FURIN/FES         | A           | C            | 0.46                  | 1.05                      | CARDIoGRAMplusC4D <sup>2</sup> | Blood Pressure         |

\*Obtained from phenoscanner (<http://www.phenoscanner.medschl.cam.ac.uk/> accessed September 1, 2017) using  $p < 0.001$  as cutoff.

#### References:

- 1: Schunkert H, König IR, Kathiresan S, Reilly MP, Assimes TL, Holm H, et al. Large-scale association analysis identifies 13 new susceptibility loci for coronary artery disease. *Nat Genet.* 2011; 43:333-338
- 2: CARDIoGRAMplusC4D Consortium, Deloukas P, Kanoni S, Willenborg C, Farrall M, Assimes TL, Thompson JR, et al. Large-scale association analysis identifies new risk loci for coronary artery disease. *Nat Genet.* 2013; 45:25-33
- 3: The IBC 50K CAD Consortium. Large-scale gene-centric analysis identifies novel variants for coronary artery disease. *PLOS Genet.* 2011;7(9): e1002260
- 4: Erdmann J, Grosshennig A, Braund PS, König IR, Hengstenberg C, Hall AS, et al. New susceptibility locus for coronary artery disease on chromosome 3q22.3. *Nat Genet.* 2009; 41:280-2
- 5: Coronary Artery Disease (C4D) Genetics Consortium. A genome-wide association study in Europeans and South Asians identifies five new loci for coronary artery disease. *Nat Genet.* 2011; 43:339-344

**Supplemental Table 2.** Baseline Characteristics of the Malmö Diet and Cancer Study Male Participants According to Tertiles of the Polygenic Risk Score for Coronary Heart Disease

|                                        | <b>PRS-T1</b>   | <b>PRS-T2</b>   | <b>PRS-T3</b>   | <b>Total</b>    |
|----------------------------------------|-----------------|-----------------|-----------------|-----------------|
| n                                      | 3110            | 3111            | 3110            | 9331            |
| Age, y (mean $\pm$ SD)                 | 59.5 $\pm$ 7.2  | 59.1 $\pm$ 7.0  | 58.8 $\pm$ 7.0  | 59.1 $\pm$ 7.1  |
| BMI, kg/m <sup>2</sup> (mean $\pm$ SD) | 26.2 $\pm$ 3.5  | 26.3 $\pm$ 3.5  | 26.2 $\pm$ 3.5  | 26.2 $\pm$ 3.5  |
| SBP, mmHg (mean $\pm$ SD)              | 144 $\pm$ 20    | 144 $\pm$ 19    | 144 $\pm$ 19    | 144 $\pm$ 20    |
| DBP, mmHg (mean $\pm$ SD)              | 88 $\pm$ 10     | 88 $\pm$ 10     | 88 $\pm$ 10     | 88 $\pm$ 10     |
| ApoA-I, $\mu$ mol/L (mean $\pm$ SD)    | 51.8 $\pm$ 8.6  | 51.8 $\pm$ 8.9  | 52.1 $\pm$ 9.3  | 51.8 $\pm$ 8.9  |
| ApoB, $\mu$ mol/L (mean $\pm$ SD)      | 2.12 $\pm$ 0.49 | 2.14 $\pm$ 0.49 | 2.18 $\pm$ 0.49 | 2.16 $\pm$ 0.49 |
| Triglycerides, mmol/L (mean $\pm$ SD)  | 1.5 $\pm$ 0.8   | 1.6 $\pm$ 0.9   | 1.6 $\pm$ 1.0   | 1.53 $\pm$ 0.93 |
| AHT, n (%)                             | 552 (17.8)      | 565 (18.2)      | 567 (18.2)      | 1684 (18.1)     |
| Lipid lowering medication, n (%)       | 76 (2.4)        | 113 (3.6)       | 93 (3.0)        | 282 (3.0)       |
| Prevalent diabetes, n (%)              | 170 (5.5)       | 185 (6.0)       | 161 (5.2)       | 516 (5.5)       |
| Incident CHD, n (%)                    | 523 (16.8)      | 647 (20.8)      | 795 (25.6)      | 1965 (21.1)     |
| <b>Smoking</b>                         |                 |                 |                 |                 |
| Never, n (%)                           | 924 (29.7)      | 865 (27.8)      | 906 (29.1)      | 2695 (28.9)     |
| Former, n (%)                          | 1303 (41.9)     | 1307 (42.0)     | 1340 (43.1)     | 3950 (42.3)     |
| Current, n (%)                         | 883 (28.4)      | 939 (30.2)      | 864 (27.8)      | 2686 (28.8)     |

PRS, polygenic risk score; T, tertile; BMI, body mass index; SBP, systolic blood pressure; DBP, diastolic blood pressure; ApoA-I, apolipoprotein A-I; ApoB, apolipoprotein B; AHT, antihypertensive medication; CHD, coronary heart disease

**Supplemental Table 3.** Baseline Characteristics of the Malmö Diet and Cancer Study Female Participants According to Tertiles of the Polygenic Risk Score for Coronary Heart Disease

|                                        | <b>PRS-T1</b>   | <b>PRS-T2</b>   | <b>PRS-T3</b>   | <b>Total</b>    |
|----------------------------------------|-----------------|-----------------|-----------------|-----------------|
| n                                      | 5037            | 5038            | 5037            | 15112           |
| Age, y (mean $\pm$ SD)                 | 57.4 $\pm$ 8.0  | 57.3 $\pm$ 8.0  | 57.2 $\pm$ 8.0  | 57.3 $\pm$ 8.0  |
| BMI, kg/m <sup>2</sup> (mean $\pm$ SD) | 25.4 $\pm$ 4.3  | 25.4 $\pm$ 4.3  | 25.5 $\pm$ 4.3  | 25.5 $\pm$ 4.3  |
| SBP, mmHg (mean $\pm$ SD)              | 139 $\pm$ 20    | 139 $\pm$ 21    | 139 $\pm$ 20    | 139 $\pm$ 20    |
| DBP, mmHg (mean $\pm$ SD)              | 84 $\pm$ 10     | 84 $\pm$ 10     | 84 $\pm$ 10     | 84 $\pm$ 10     |
| ApoA-I, $\mu$ mol/L (mean $\pm$ SD)    | 58.9 $\pm$ 10   | 58.9 $\pm$ 9.6  | 58.6 $\pm$ 9.6  | 58.7 $\pm$ 10   |
| ApoB, $\mu$ mol/L (mean $\pm$ SD)      | 2.01 $\pm$ 0.51 | 2.05 $\pm$ 0.51 | 2.07 $\pm$ 0.51 | 2.05 $\pm$ 0.51 |
| Triglycerides, mmol/L (mean $\pm$ SD)  | 1.25 $\pm$ 0.64 | 1.23 $\pm$ 0.74 | 1.29 $\pm$ 0.72 | 1.26 $\pm$ 0.70 |
| AHT, n (%)                             | 825 (16.4)      | 771 (15.3)      | 801 (15.9)      | 2397 (15.9)     |
| Lipid lowering medication, n (%)       | 72 (1.4)        | 80 (1.6)        | 107 (2.1)       | 259 (1.7)       |
| Prevalent diabetes, n (%)              | 167 (3.3)       | 159 (3.2)       | 168 (3.3)       | 494 (3.3)       |
| Incident CHD, n (%)                    | 346 (6.9)       | 392 (7.8)       | 514 (10.2)      | 1252 (8.3)      |
| <b>Smoking</b>                         |                 |                 |                 |                 |
| Never, n (%)                           | 2215 (44.0)     | 2265 (45.0)     | 2252 (44.7)     | 6732 (44.6)     |
| Former, n (%)                          | 1375 (27.3)     | 1386 (27.5)     | 1428 (28.4)     | 4189 (27.7)     |
| Current, n (%)                         | 1447 (28.7)     | 1387 (27.5)     | 1357 (26.9)     | 4191 (27.7)     |

PRS, polygenic risk score; T, tertile; BMI, body mass index; SBP, systolic blood pressure; DBP, diastolic blood pressure; ApoA-I, apolipoprotein A-I; ApoB, apolipoprotein B; AHT, antihypertensive medication; CHD, coronary heart disease

**Supplemental Table 4.** Baseline Characteristics of the Malmö Diet and Cancer Study Male Participants According to Smoking Status

|                                        | <b>Never</b>    | <b>Former</b>   | <b>Current</b>  | <b>Total</b>    |
|----------------------------------------|-----------------|-----------------|-----------------|-----------------|
| n                                      | 2695            | 3950            | 2686            | 9331            |
| Age, y (mean $\pm$ SD)                 | 59.2 $\pm$ 7.0  | 59.9 $\pm$ 7.3  | 58.0 $\pm$ 6.7  | 59.1 $\pm$ 7.1  |
| BMI, kg/m <sup>2</sup> (mean $\pm$ SD) | 26.1 $\pm$ 3.4  | 26.8 $\pm$ 3.4  | 25.5 $\pm$ 3.5  | 26.2 $\pm$ 3.5  |
| SBP, mmHg (mean $\pm$ SD)              | 143 $\pm$ 19    | 146 $\pm$ 20    | 142 $\pm$ 20    | 144 $\pm$ 20    |
| DBP, mmHg (mean $\pm$ SD)              | 88 $\pm$ 10     | 88 $\pm$ 10     | 87 $\pm$ 10     | 88 $\pm$ 10     |
| ApoA-I, $\mu$ mol/L (mean $\pm$ SD)    | 51.8 $\pm$ 8.6  | 52.5 $\pm$ 8.6  | 51.1 $\pm$ 9.3  | 51.8 $\pm$ 8.9  |
| ApoB, $\mu$ mol/L (mean $\pm$ SD)      | 2.09 $\pm$ 0.47 | 2.16 $\pm$ 0.51 | 2.20 $\pm$ 0.51 | 2.16 $\pm$ 0.49 |
| Triglycerides, mmol/L (mean $\pm$ SD)  | 1.41 $\pm$ 0.71 | 1.56 $\pm$ 0.90 | 1.61 $\pm$ 1.14 | 1.53 $\pm$ 0.93 |
| AHT, n (%)                             | 491 (18.2)      | 794 (20.1)      | 399 (14.9)      | 1684 (18.1)     |
| Lipid lowering medication, n (%)       | 67 (2.5)        | 132 (3.3)       | 83 (3.1)        | 282 (3.0)       |
| Prevalent diabetes, n (%)              | 135 (5.0)       | 254 (6.4)       | 127 (4.7)       | 516 (5.5)       |
| Incident CHD, n (%)                    | 475 (17.6)      | 821 (20.8)      | 669 (24.9)      | 1965 (21.1)     |
| <b>Tertile of PRS</b>                  |                 |                 |                 |                 |
| T1, n (%)                              | 924 (34.3)      | 1303 (33.0)     | 883 (32.9)      | 3110 (33.3)     |
| T2, n (%)                              | 865 (32.1)      | 1307 (33.1)     | 939 (35.0)      | 3111 (33.3)     |
| T3, n (%)                              | 906 (33.6)      | 1340 (33.9)     | 864 (32.1)      | 3110 (33.3)     |

BMI, body mass index; SBP, systolic blood pressure; DBP, diastolic blood pressure; ApoA-I, apolipoprotein A-I; ApoB, apolipoprotein B; AHT, antihypertensive medication; CHD, coronary heart disease; PRS, polygenic risk score; T, tertile

**Supplemental Table 5.** Baseline Characteristics of the Malmö Diet and Cancer Study Female Participants According to Smoking Status

|                                        | <b>Never</b>    | <b>Former</b>   | <b>Current</b>  | <b>Total</b>    |
|----------------------------------------|-----------------|-----------------|-----------------|-----------------|
| n                                      | 6732            | 4189            | 4191            | 15112           |
| Age, y (mean $\pm$ SD)                 | 58.9 $\pm$ 8.1  | 56.7 $\pm$ 8.0  | 55.4 $\pm$ 7.4  | 57.3 $\pm$ 8.0  |
| BMI, kg/m <sup>2</sup> (mean $\pm$ SD) | 25.8 $\pm$ 4.3  | 25.7 $\pm$ 4.2  | 24.7 $\pm$ 4.2  | 25.5 $\pm$ 4.3  |
| SBP, mmHg (mean $\pm$ SD)              | 142 $\pm$ 20    | 138 $\pm$ 20    | 136 $\pm$ 20    | 139 $\pm$ 20    |
| DBP, mmHg (mean $\pm$ SD)              | 85 $\pm$ 10     | 84 $\pm$ 10     | 83 $\pm$ 10     | 84 $\pm$ 10     |
| ApoA-I, $\mu$ mol/L (mean $\pm$ SD)    | 58.9 $\pm$ 9.6  | 59.6 $\pm$ 10   | 57.1 $\pm$ 10   | 58.7 $\pm$ 10   |
| ApoB, $\mu$ mol/L (mean $\pm$ SD)      | 2.05 $\pm$ 0.51 | 1.97 $\pm$ 0.51 | 2.09 $\pm$ 0.51 | 2.05 $\pm$ 0.51 |
| Triglycerides, mmol/L (mean $\pm$ SD)  | 1.25 $\pm$ 0.70 | 1.22 $\pm$ 0.65 | 1.31 $\pm$ 0.75 | 1.26 $\pm$ 0.70 |
| AHT, n (%)                             | 1209 (18.0)     | 673 (16.1)      | 515 (12.3)      | 2397 (15.9)     |
| Lipid lowering medication, n (%)       | 107 (1.6)       | 89 (2.1)        | 63 (1.5)        | 259 (1.7)       |
| Prevalent diabetes, n (%)              | 233 (3.5)       | 144 (3.4)       | 117 (2.8)       | 494 (3.3)       |
| Incident CHD, n (%)                    | 506 (7.5)       | 327 (7.8)       | 419 (10.0)      | 1252 (8.3)      |
| <b>Tertile of PRS</b>                  |                 |                 |                 |                 |
| T1, n (%)                              | 2215 (32.9)     | 1375 (32.8)     | 1447 (34.5)     | 5037 (33.3)     |
| T2, n (%)                              | 2265 (33.7)     | 1386 (33.1)     | 1387 (33.1)     | 5038 (33.3)     |
| T3, n (%)                              | 2252 (33.5)     | 1428 (34.1)     | 1357 (32.4)     | 5037 (33.3)     |

BMI, body mass index; SBP, systolic blood pressure; DBP, diastolic blood pressure; ApoA-I, apolipoprotein A-I; ApoB, apolipoprotein B; AHT, antihypertensive medication; CHD, coronary heart disease; PRS, polygenic risk score; T, tertile

**Supplemental Table 6.** Association between Smoking Status and Coronary Heart Disease in Tertiles of Polygenic Risk Score among Men

| PRS  | Smoking      | OR (95% CI) †    | PValue               |
|------|--------------|------------------|----------------------|
| T1 * |              |                  |                      |
|      | Never        | 1.00 (ref)       |                      |
|      | Former       | 1.59 (1.23–2.04) | $3 \times 10^{-4}$   |
|      | Current      | 2.17 (1.66–2.84) | $1.2 \times 10^{-8}$ |
|      | Per category | 1.46 (1.28–1.67) | $1.1 \times 10^{-8}$ |
| T2   |              |                  |                      |
|      | Never        | 1.00 (ref)       |                      |
|      | Former       | 1.11 (0.89–1.40) | 0.35                 |
|      | Current      | 1.70 (1.34–2.16) | $1 \times 10^{-5}$   |
|      | Per category | 1.32 (1.17–1.49) | $7.0 \times 10^{-6}$ |
| T3   |              |                  |                      |
|      | Never        | 1.00 (ref)       |                      |
|      | Former       | 1.03 (0.84–1.25) | 0.80                 |
|      | Current      | 1.31 (1.05–1.62) | 0.017                |
|      | Per category | 1.14 (1.02–1.28) | 0.017                |

\* T1, T2, T3 designate the first, second and third tertiles of the polygenic risk score

† Odds ratio and 95% confidence interval for coronary heart disease among former or current smokers compared to never smokers

Model adjusted for age, sex, total energy intake, alcohol intake, leisure-time physical activity, and education



**Supplemental Table 7.** Association between Smoking Status and Coronary Heart Disease in Tertiles of Polygenic Risk Score among Women

| PRS  | Smoking      | OR (95% CI) †    | PValue               |
|------|--------------|------------------|----------------------|
| T1 * |              |                  |                      |
|      | Never        | 1.00 (ref)       |                      |
|      | Former       | 1.27 (0.95–1.69) | 0.11                 |
|      | Current      | 1.95 (1.49–2.55) | $9.7 \times 10^{-7}$ |
|      | Per category | 1.39 (1.22–1.60) | $1.0 \times 10^{-6}$ |
| T2   |              |                  |                      |
|      | Never        | 1.00 (ref)       |                      |
|      | Former       | 1.02 (0.77–1.35) | 0.90                 |
|      | Current      | 2.06 (1.60–2.64) | $1.8 \times 10^{-8}$ |
|      | Per category | 1.42 (1.25–1.62) | $9.3 \times 10^{-8}$ |
| T3   |              |                  |                      |
|      | Never        | 1.00 (ref)       |                      |
|      | Former       | 1.45 (1.15–1.83) | 0.001                |
|      | Current      | 1.63 (1.29–2.06) | $4 \times 10^{-5}$   |
|      | Per category | 1.29 (1.15–1.44) | $2 \times 10^{-5}$   |

\* T1, T2, T3 designate the first, second and third tertiles of the polygenic risk score

† Odds ratio and 95% confidence interval for coronary heart disease among former or current smokers compared to never smokers

Model adjusted for age, sex, total energy intake, alcohol intake, leisure-time physical activity, and education

**Supplemental Table 8.** Association between Smoking Status and Coronary Heart Disease in Tertiles of Polygenic Risk Score among Individuals with no Family History for Myocardial Infarction

| PRS  | Smoking      | OR (95% CI) †    | PValue               |
|------|--------------|------------------|----------------------|
| T1 * |              |                  |                      |
|      | Never        | 1.00 (ref)       |                      |
|      | Former       | 1.51 (1.17–1.95) | 0.001                |
|      | Current      | 2.17 (1.68–2.79) | $2.4 \times 10^{-9}$ |
|      | Per category | 1.47 (1.30–1.68) | $2.1 \times 10^{-9}$ |
| T2   |              |                  |                      |
|      | Never        | 1.00 (ref)       |                      |
|      | Former       | 1.05 (0.84–1.33) | 0.62                 |
|      | Current      | 1.71 (1.36–2.15) | $3.6 \times 10^{-6}$ |
|      | Per category | 1.32 (1.17–1.48) | $3.3 \times 10^{-6}$ |
| T3   |              |                  |                      |
|      | Never        | 1.00 (ref)       |                      |
|      | Former       | 1.11 (0.90–1.35) | 0.33                 |
|      | Current      | 1.46 (1.18–1.80) | $4 \times 10^{-4}$   |
|      | Per category | 1.21 (1.09–1.34) | $5 \times 10^{-4}$   |

\* T1, T2, T3 designate the first, second and third tertiles of the polygenic risk score

† Odds ratio and 95% confidence interval for coronary heart disease among former or current smokers compared to never smokers

Model adjusted for age, sex, total energy intake, alcohol intake, leisure-time physical activity, and education

**Supplemental Table 9.** Association between Smoking Status and Coronary Heart Disease in Tertiles of Polygenic Risk Score among Individuals with Family History for Myocardial Infarction

| PRS  | Smoking      | OR (95% CI) †    | PValue               |
|------|--------------|------------------|----------------------|
| T1 * |              |                  |                      |
|      | Never        | 1.00 (ref)       |                      |
|      | Former       | 1.20 (0.91–1.58) | 0.20                 |
|      | Current      | 1.99 (1.51–2.63) | $1.4 \times 10^{-6}$ |
|      | Per category | 1.41 (1.23–1.63) | $1.8 \times 10^{-6}$ |
| T2   |              |                  |                      |
|      | Never        | 1.00 (ref)       |                      |
|      | Former       | 1.19 (0.91–1.54) | 0.20                 |
|      | Current      | 1.82 (1.40–2.38) | $9.2 \times 10^{-6}$ |
|      | Per category | 1.35 (1.18–1.4)  | $1.2 \times 10^{-5}$ |
| T3   |              |                  |                      |
|      | Never        | 1.00 (ref)       |                      |
|      | Former       | 1.14 (0.91–1.43) | 0.26                 |
|      | Current      | 1.41 (1.11–1.81) | 0.006                |
|      | Per category | 1.19 (1.05–1.34) | 0.006                |

\* T1, T2, T3 designate the first, second and third tertiles of the polygenic risk score

† Odds ratio and 95% confidence interval for coronary heart disease among former or current smokers compared to never smokers

Model adjusted for age, sex, total energy intake, alcohol intake, leisure-time physical activity, and education

**Supplemental Table 10.** C-statistics and Discrimination by Polygenic Risk Score for Incident Coronary Heart Disease by Smoking Status among Men

|                 | AUC (95%CI)         |                         | IDI (SE)      | PValue              |
|-----------------|---------------------|-------------------------|---------------|---------------------|
|                 | Traditional Model * | Traditional Model + PRS |               |                     |
| Never Smokers   | 0.675 (0.649-0.700) | 0.702 (0.676-0.727)     | 0.023 (0.004) | $3 \times 10^{-11}$ |
| Former Smokers  | 0.664 (0.644-0.685) | 0.673 (0.652-0.693)     | 0.007 (0.001) | $4 \times 10^{-6}$  |
| Current Smokers | 0.661 (0.637-0.685) | 0.664 (0.640-0.688)     | 0.004 (0.001) | 0.003               |

\* Traditional model includes: age, sex, family history of myocardial infarction, systolic blood pressure, antihypertensive medication, ApoB as a proxy for LDL cholesterol, ApoA-I as a proxy for HDL cholesterol and diabetes at baseline  
AUC, area under receiver operating curve; CI, confidence interval; IDI: integrated discrimination improvement; PRS, polygenic risk score

**Supplemental Table 11.** C-statistics and Discrimination by Polygenic Risk Score for Incident Coronary Heart Disease by Smoking Status among Women

|                 | AUC (95%CI)         |                         | IDI (SE)      | PValue |
|-----------------|---------------------|-------------------------|---------------|--------|
|                 | Traditional Model * | Traditional Model + PRS |               |        |
| Never Smokers   | 0.745 (0.725-0.765) | 0.753 (0.732-0.773)     | 0.005 (0.001) | 0.0001 |
| Former Smokers  | 0.755 (0.727-0.782) | 0.764 (0.737-0.790)     | 0.006 (0.002) | 0.004  |
| Current Smokers | 0.729 (0.704-0.754) | 0.734 (0.710-0.759)     | 0.004 (0.001) | 0.003  |

\* Traditional model includes: age, sex, family history of myocardial infarction, systolic blood pressure, antihypertensive medication, ApoB as a proxy for LDL cholesterol, ApoA-I as a proxy for HDL cholesterol and diabetes at baseline  
AUC, area under receiver operating curve; CI, confidence interval; IDI: integrated discrimination improvement; PRS, polygenic risk score

**Supplemental Figure 1.** Odds Ratio for Coronary Heart Disease According to Tertiles of Polygenic Risk Score and Smoking Status among Men

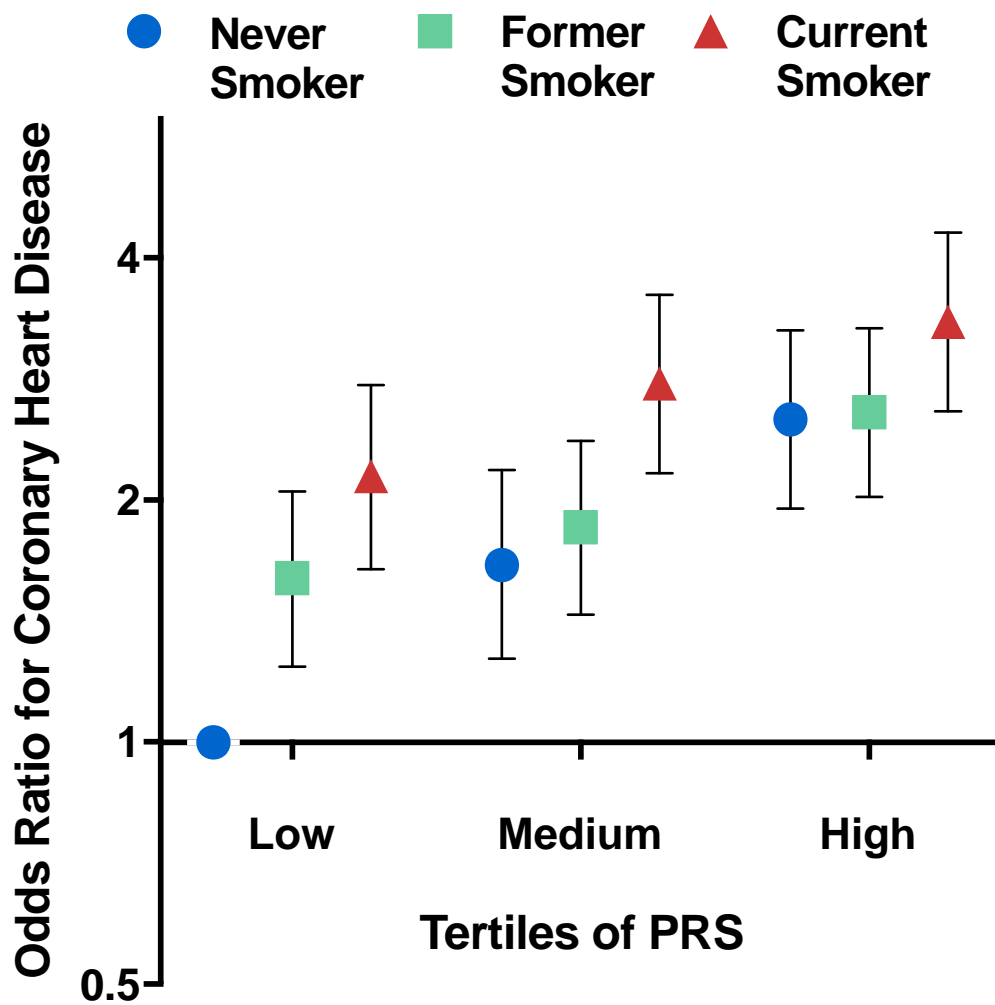

Individuals who are in the lowest tertile of polygenic risk score (PRS) and are never smokers were considered as a reference group. Smoking was associated with higher risk for coronary heart disease among individuals within each tertile of PRS. The magnitude of risk relative risk increase by smoking was higher among men with low PRS (OR: 1.46; 95% CI: 1.28–1.67) compared to men with high PRS (OR: 1.14; 1.02–1.28).

**Supplemental Figure 2.** Odds Ratio for Coronary Heart Disease According to Tertiles of Polygenic Risk Score and Smoking Status among Women

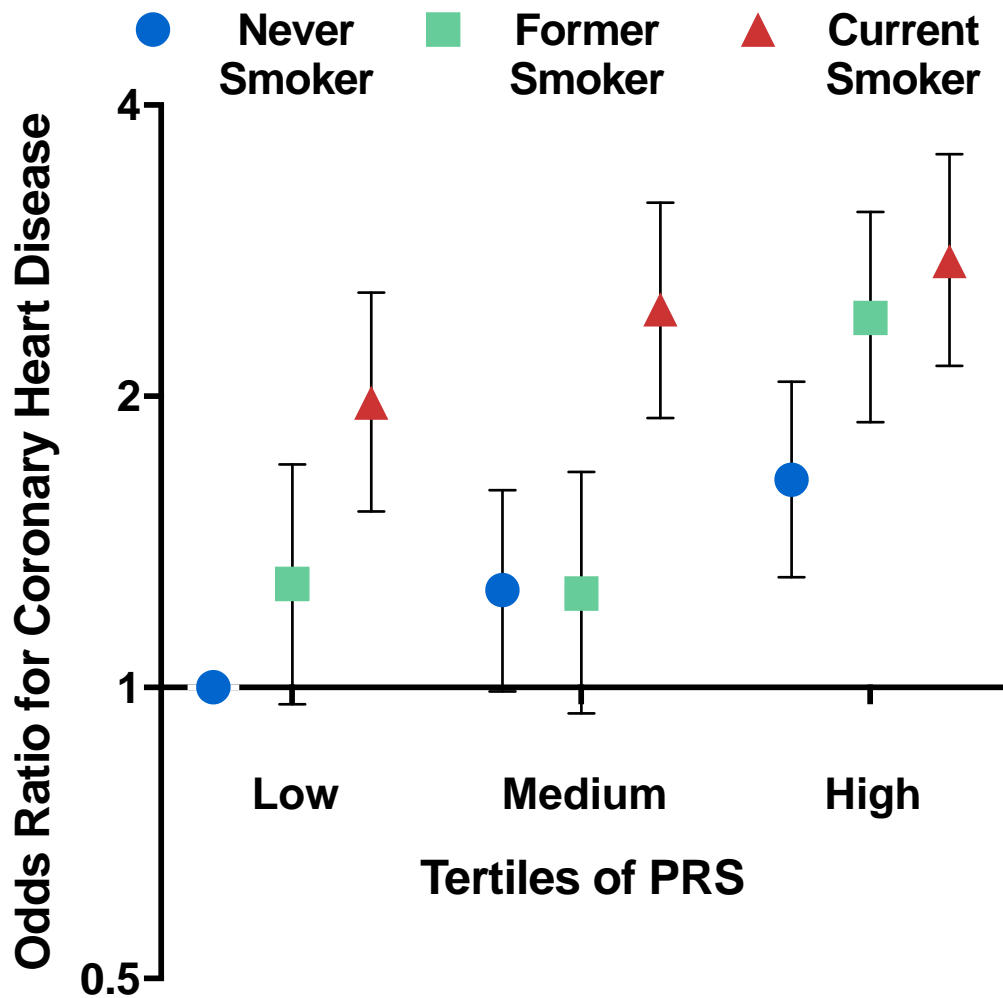

Individuals who are in the lowest tertile of polygenic risk score (PRS) and are never smokers were considered as a reference group. Smoking was associated with higher risk for coronary heart disease among individuals within each tertile of PRS. The magnitude of risk relative risk increase by smoking was higher among women with low PRS (OR: 1.39; 95% CI: 1.22–1.60) compared to women with low PRS (OR: 1.29; 1.15–1.44).

**Supplemental Figure 3.** Interaction Estimates between each Single Nucleotide Polymorphism and Smoking Status on the Risk of Coronary Heart Disease

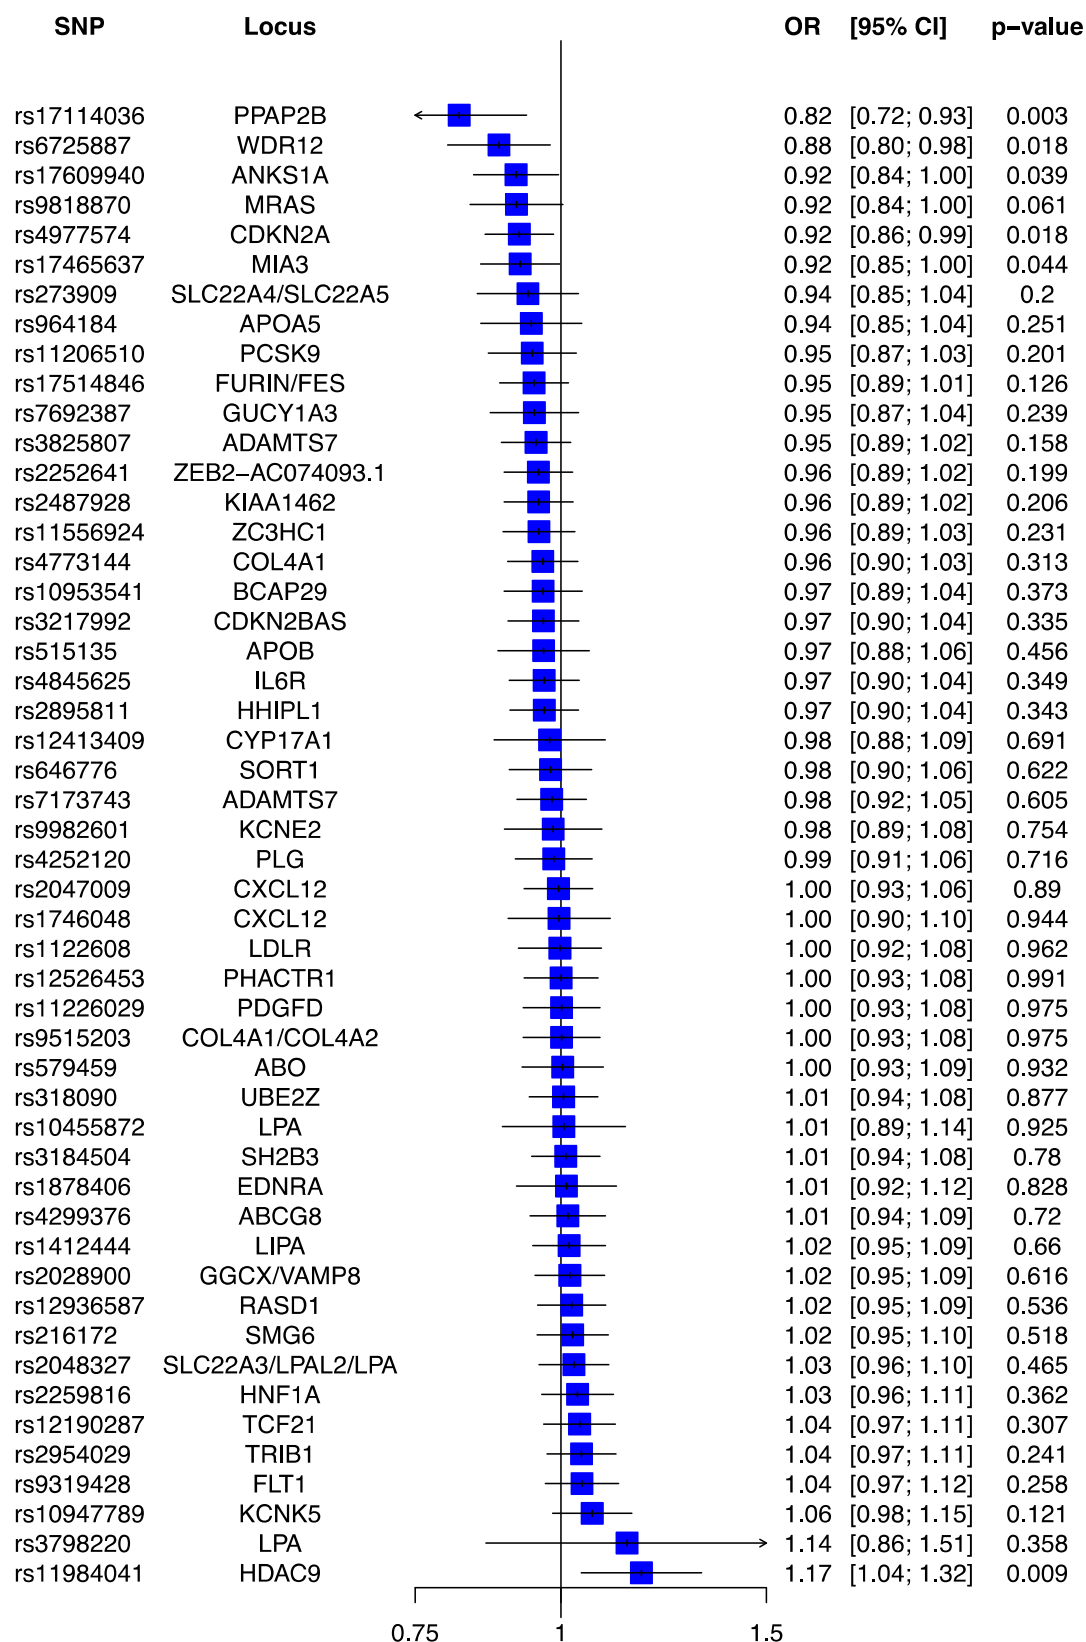



**Supplemental Figure 4.** Interaction Estimates between each Single Nucleotide Polymorphism and Smoking Status on the Risk of Coronary Heart Disease among Men

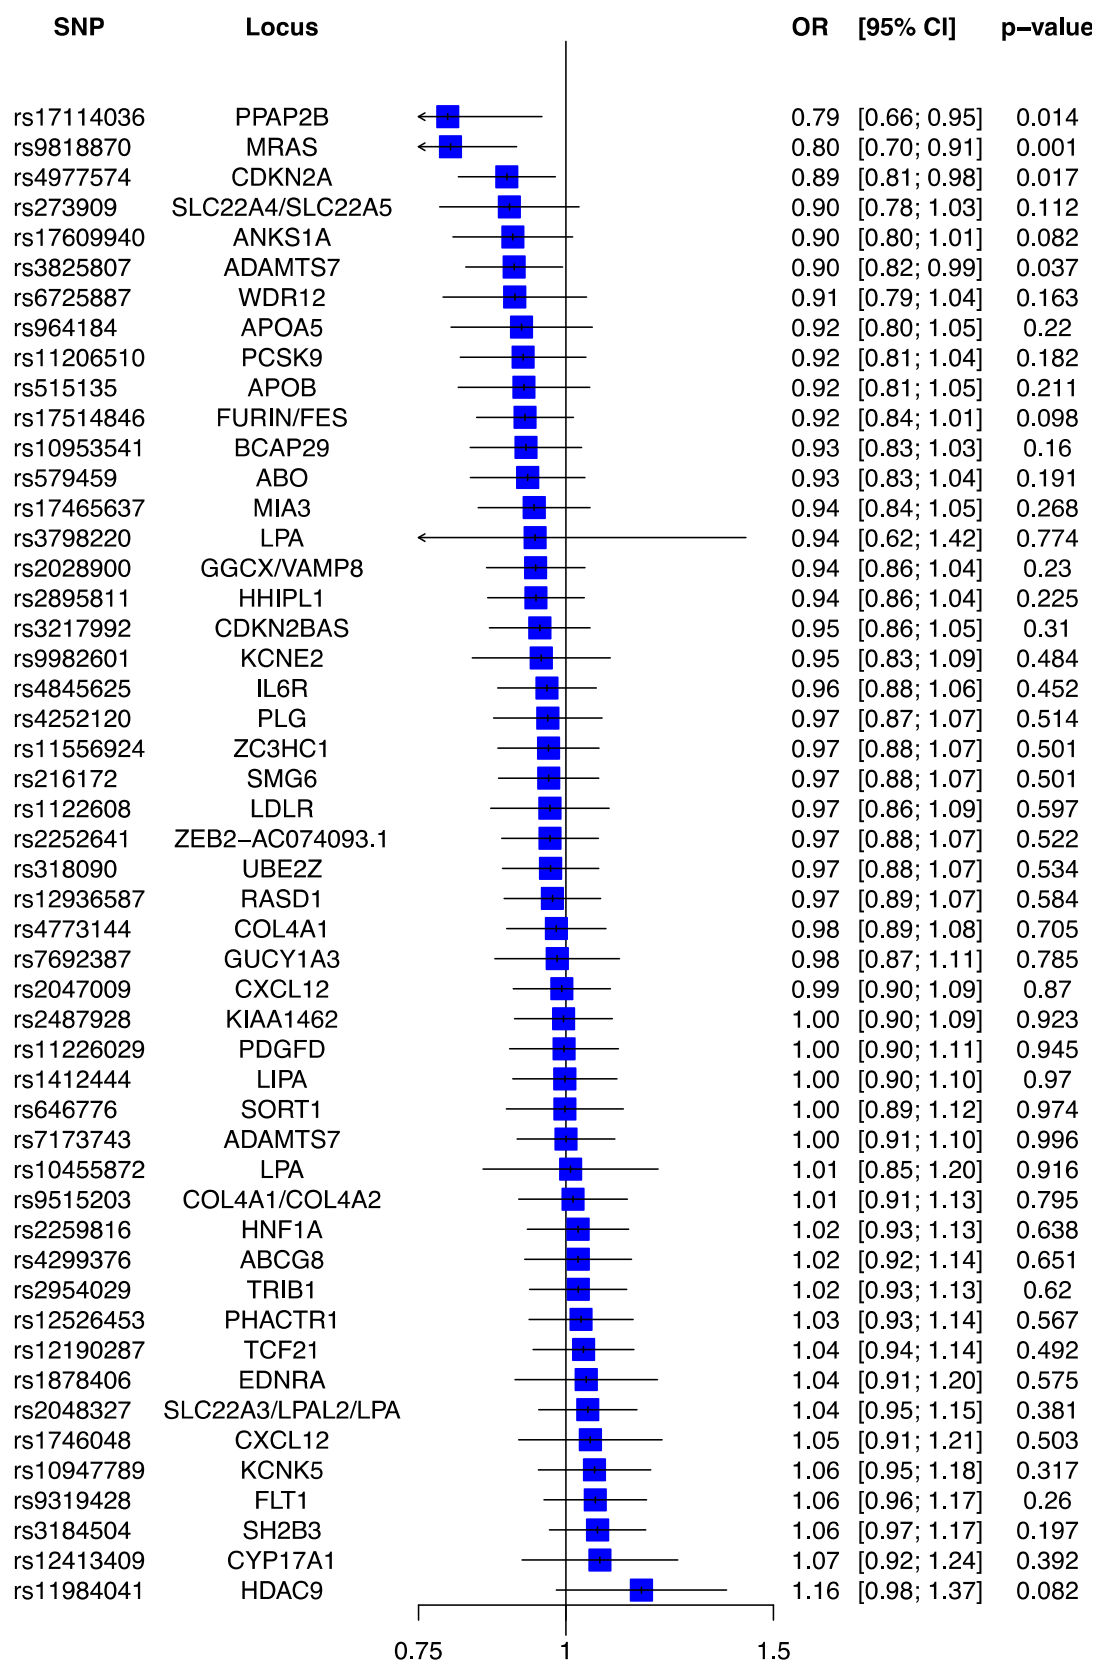

**Supplemental Figure 5.** Interaction Estimates between each Single Nucleotide Polymorphism and Smoking Status on the Risk of Coronary Heart Disease among Women

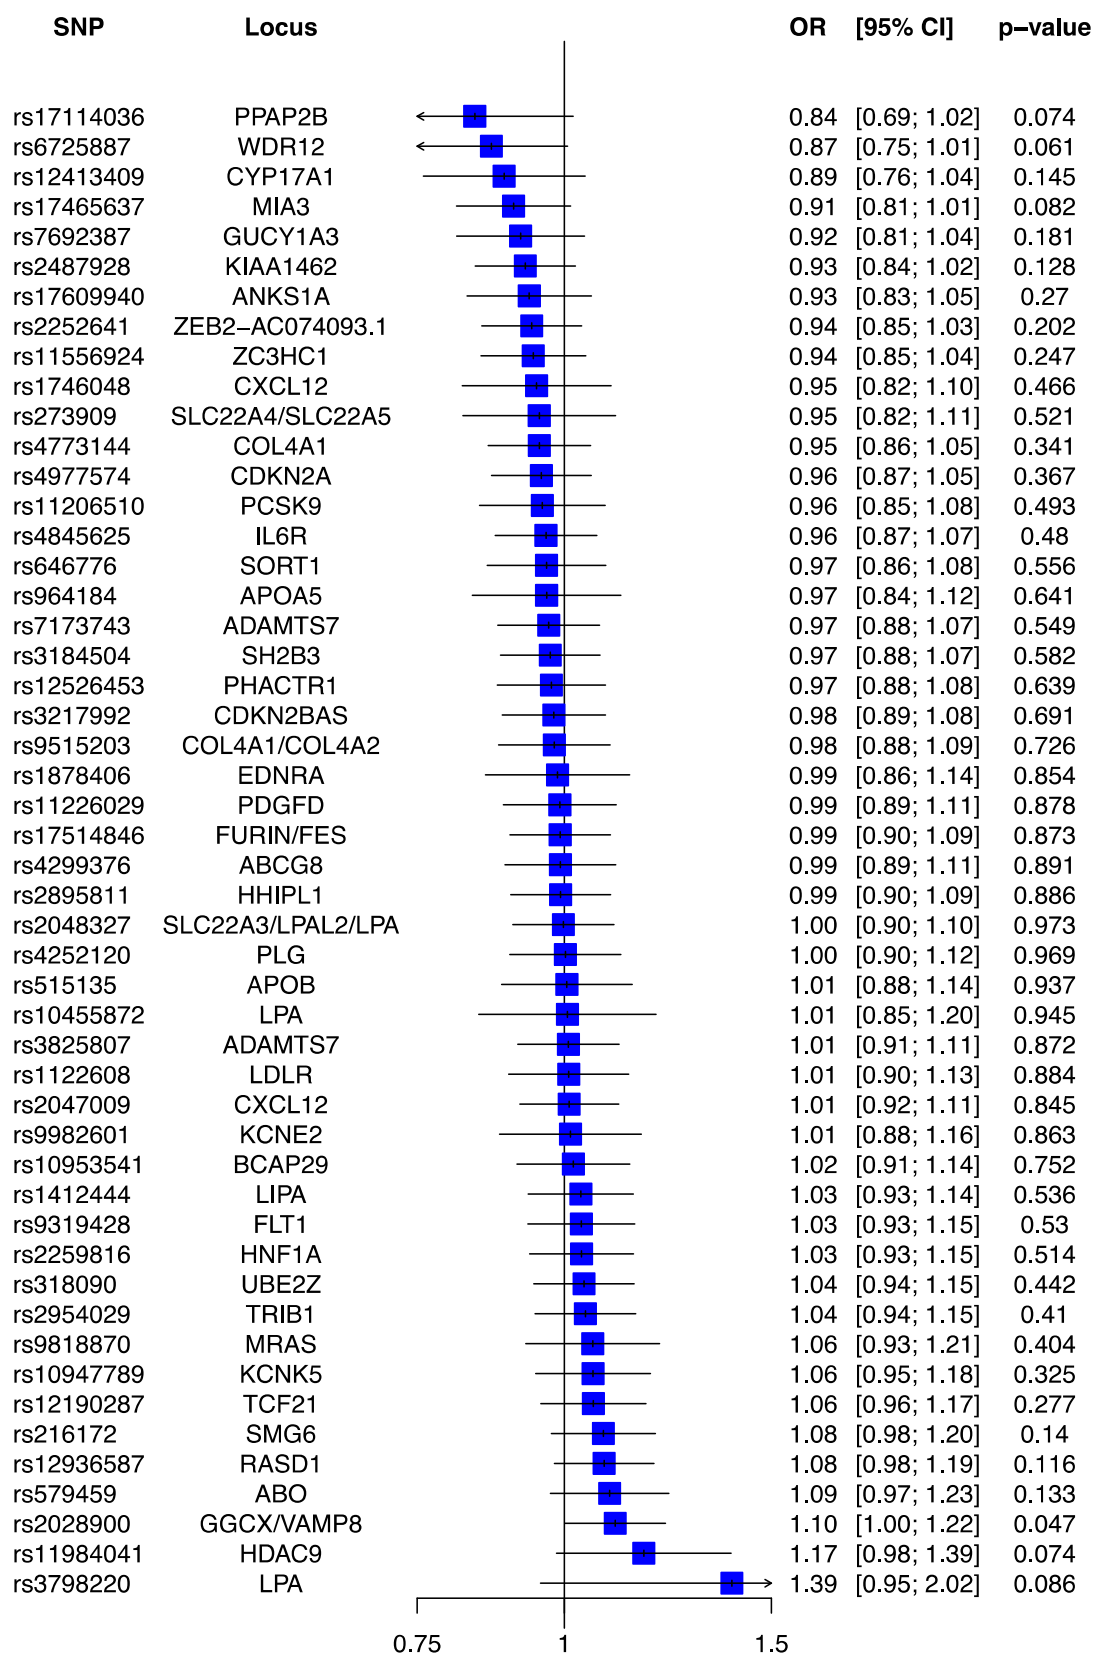

Supplement: hcg-11-e001856-s001.pdf [file hcg-11-e001856-s001.pdf]
